# Supplementary material for: Mesenchymal Stromal Cells-Derived β2-Microglobulin Promotes Epithelial–Mesenchymal Transition of Esophageal Squamous Cell Carcinoma Cells
Source: PubMed Central journal article supplement (PMC5883027; doi:10.1038/s41598-018-23651-5), 2018-04-03
Supplement: 41598_2018_23651_MOESM1_ESM.pdf [file 41598_2018_23651_MOESM1_ESM.pdf]

## Supplementary Information

### Mesenchymal Stromal Cells-Derived $\beta$ 2-Microglobulin Promotes Epithelial–Mesenchymal Transition of Esophageal Squamous Cell Carcinoma Cells

Junjie Wang <sup>1,#</sup> Weilin Yang <sup>2,3,4,#</sup>, Tao Wang <sup>1,#</sup>, Xiaoyong Chen <sup>1</sup>, Jiancheng Wang <sup>1</sup>, Xiaoran Zhang <sup>1</sup>, Chuang Cai <sup>1</sup>, Beilong Zhong <sup>5</sup>, Jiabin Wu <sup>2</sup>, Zhenguang Chen <sup>2,3,4,\*</sup>, Weijun Huang<sup>1,\*</sup> and Andy Peng Xiang <sup>1,6,7,\*</sup>

#### Supplementary Figure S1: Construction of MSCs cell line with B2M knock down

Immunofluorescence study revealed the GFP fluorescence expression in MSC<sup>NTC</sup> and MSC<sup>shB2M</sup> cells which indirectly reflected the interference efficient of lentivirus system. Results were confirmed by qPCR and western blots analysis after passaging cells. Scales bars, 100 $\mu$ m.

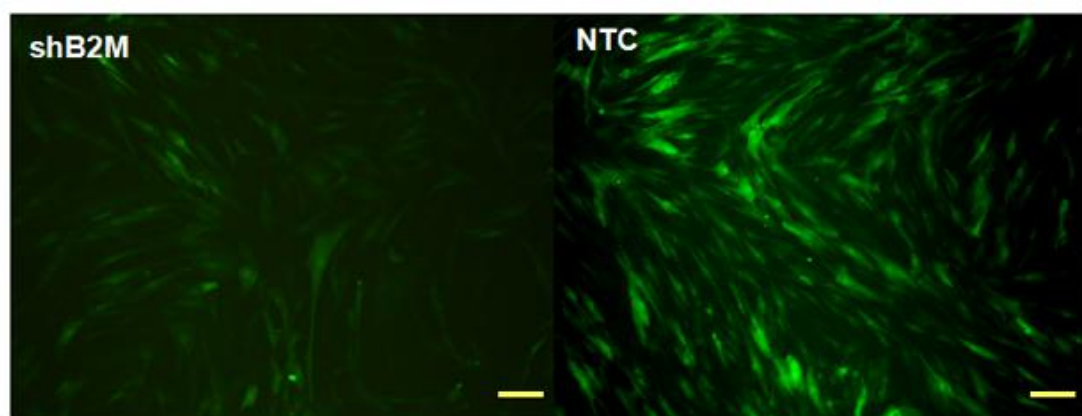

### Supplementary Figure S2: Protein level of secreted B2M tested by ELISA kit

Secreted B2M level in supernatant of TE-1/Eca109/MSc cells were tested with a commercial ELISA kit (SEA260Hu, Cloud-Clone Corp). We found that protein level of secreted B2M of MSC was almost five to ten times higher than that of ESCC cell lines (TE-1:  $3.75 \pm 0.34$  ng/ml, Eca109:  $7.92 \pm 1.04$  ng/ml, MSC:  $30.41 \pm 2.93$  ng/ml, data were averaged as mean  $\pm$  S.D. per  $10^7$  cells, n = 3)

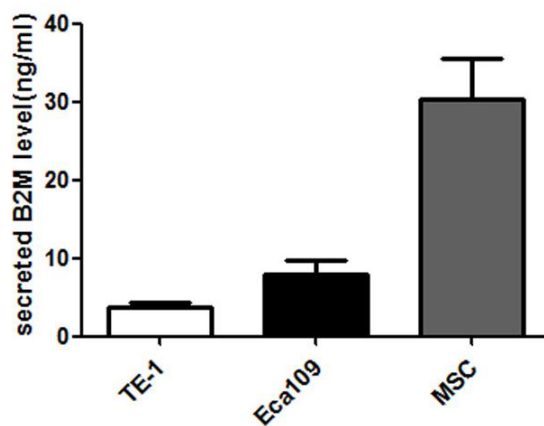

### Supplementary Figure S3: Representative negative surface markers of MSC<sup>NTC</sup> and MSC<sup>shB2M</sup>

The results of the flow cytometry analysis revealed that MSC<sup>NTC</sup> and the MSC<sup>shB2M</sup> cells did not express surface markers CD34 and CD45, which was similar to wild-type MSCs.

CD34 (550761, BD Pharmingen), CD45 (560975, BD Pharmingen)

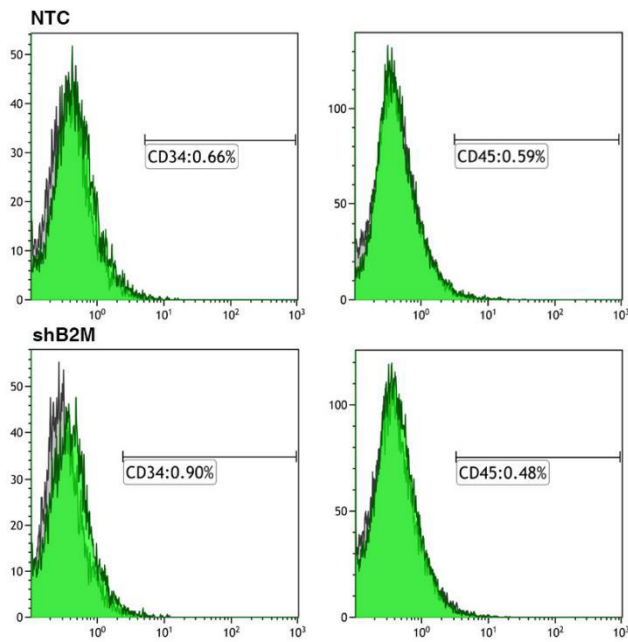

**Supplementary Figure S4: Representative image of tumor spheroid**

Representative image of spheroid formed by TE-1 cells in a modified serum-free medium. Spheroids which have more than 50µm in diameter are included in the statistics. Scales bars, 200µm.

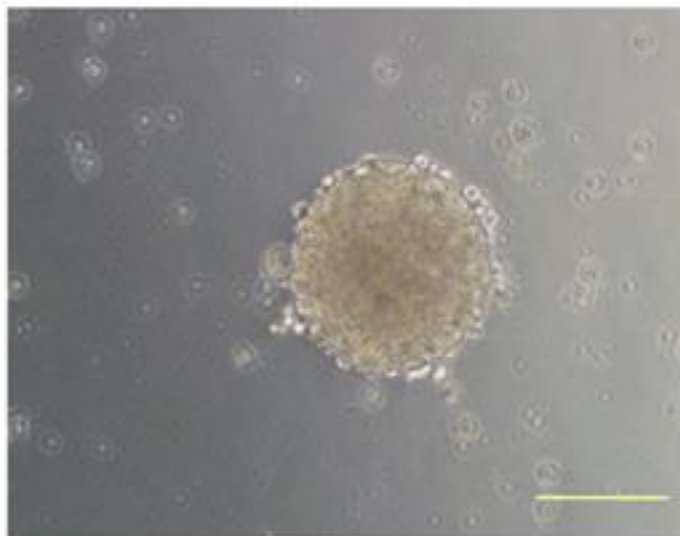

**Supplementary Figure S5: Original western blot scanning document of Figure 1**

Marked sections with red lines were presented in the manuscript.

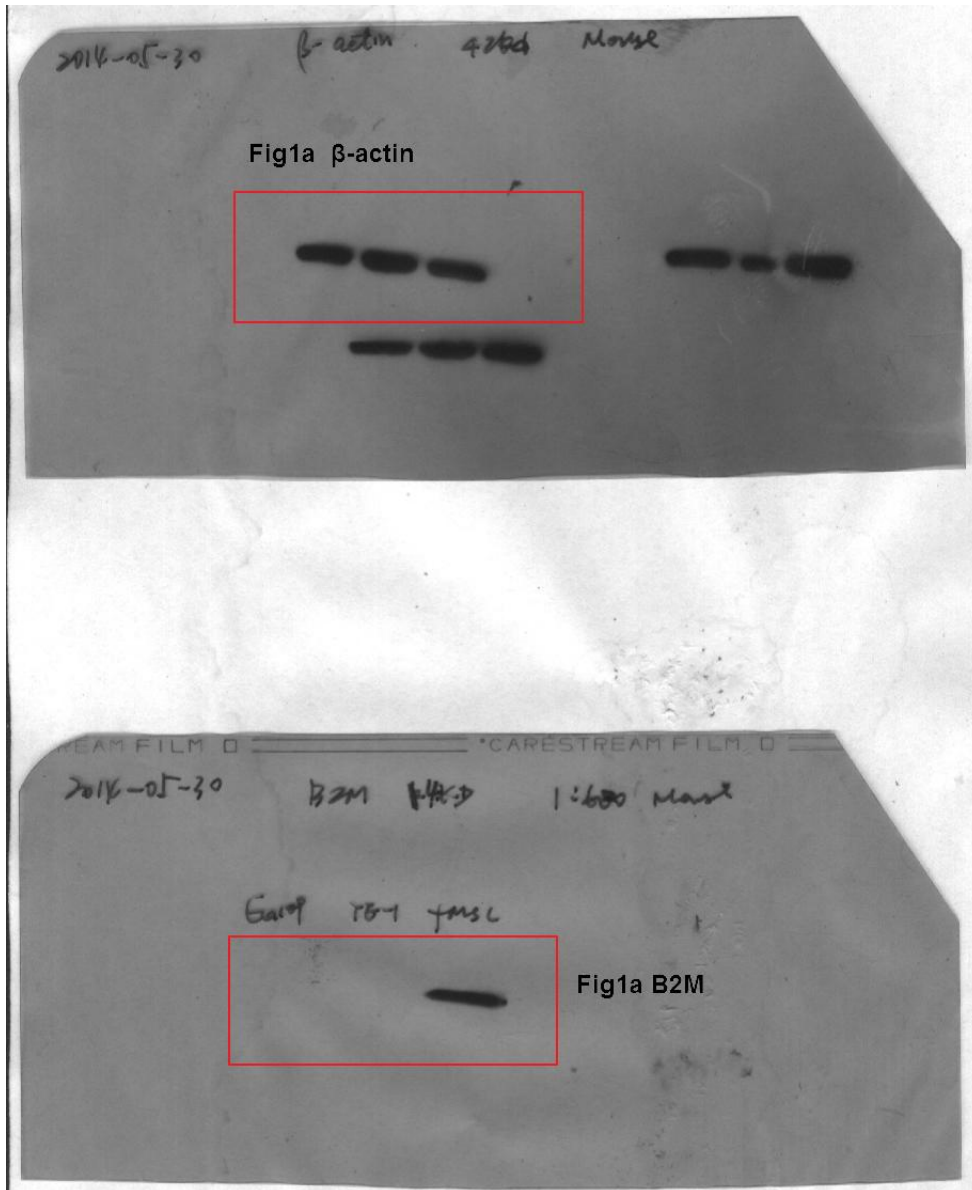

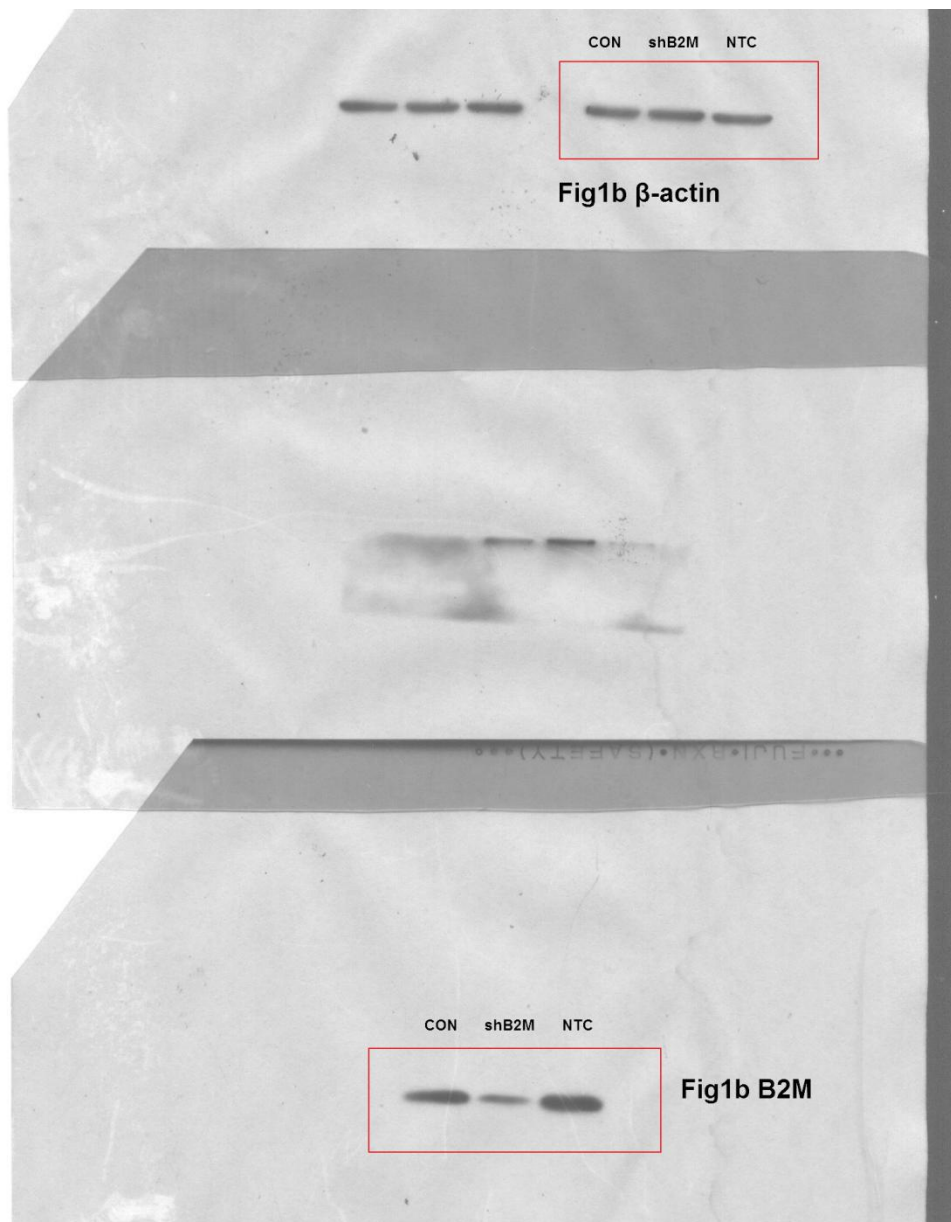

**Supplementary Figure S6: Original western blot scanning document of Figure 2**

Marked sections with red lines were presented in the manuscript.

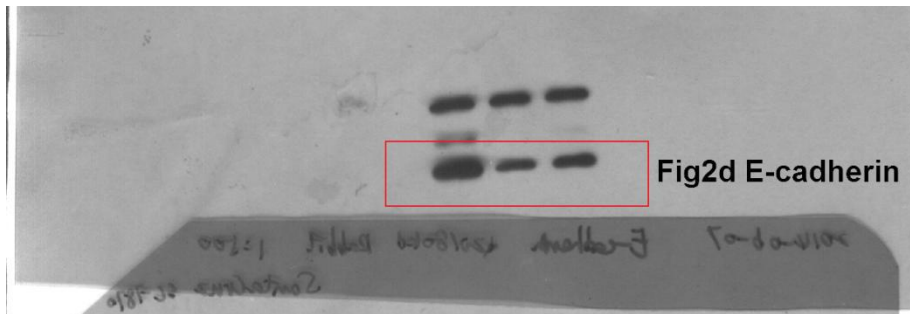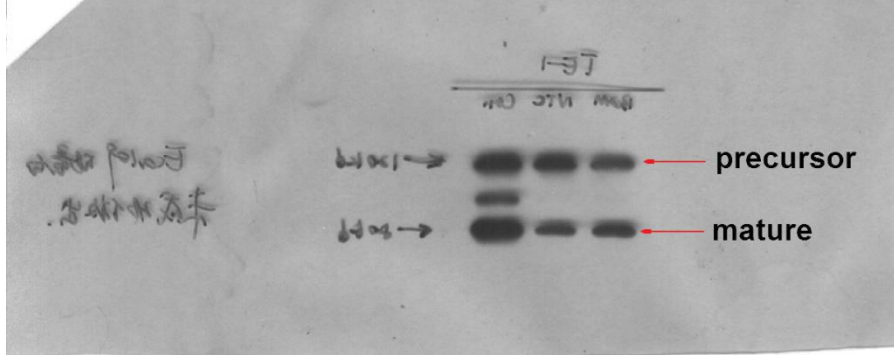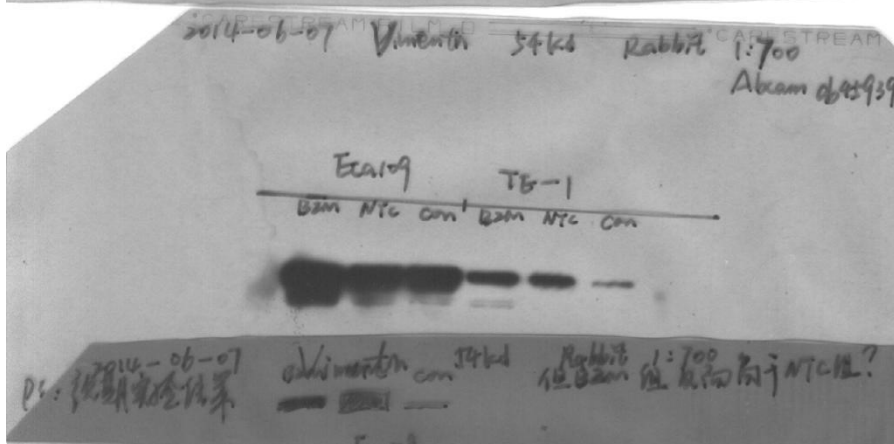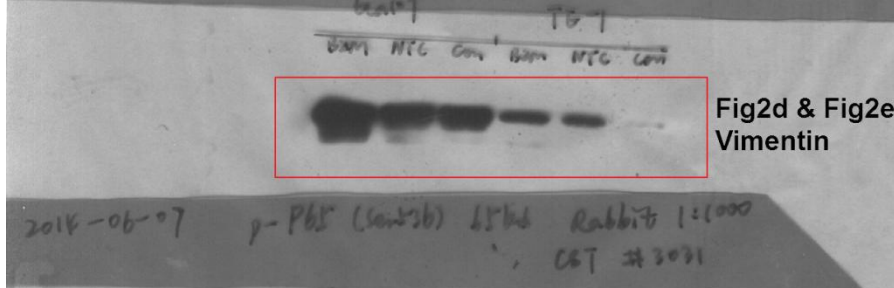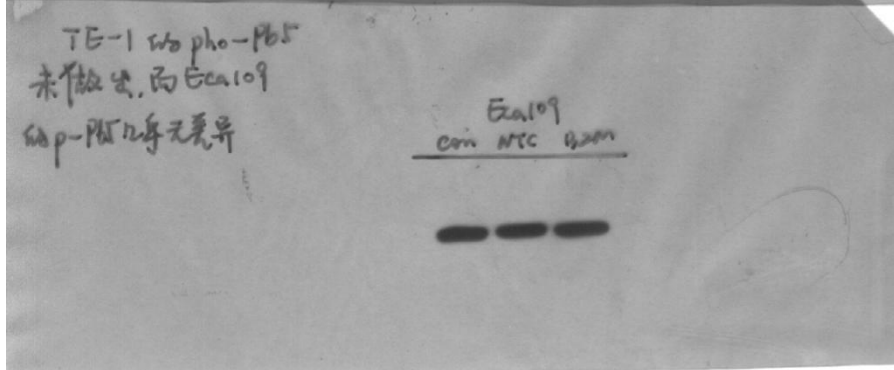

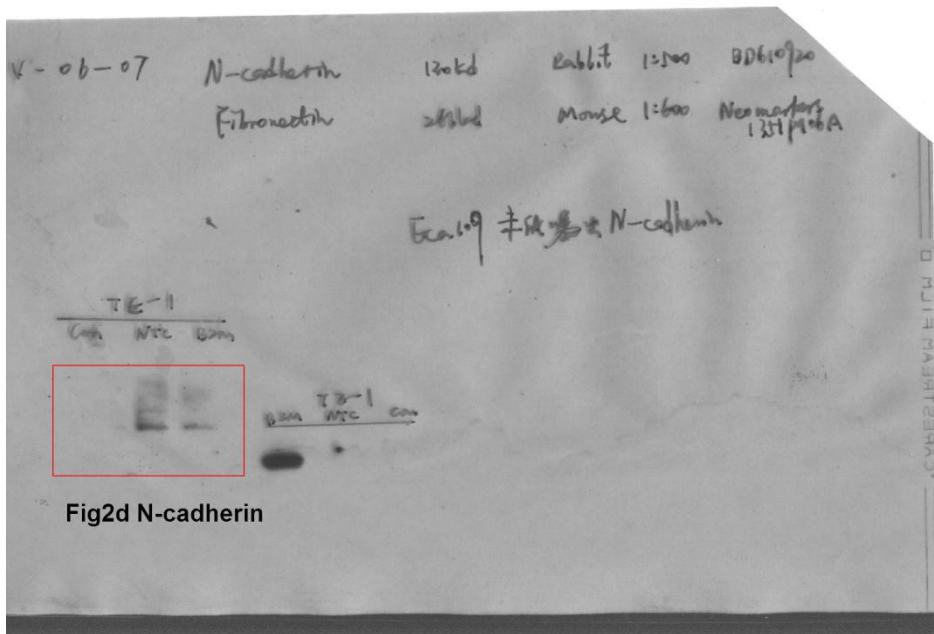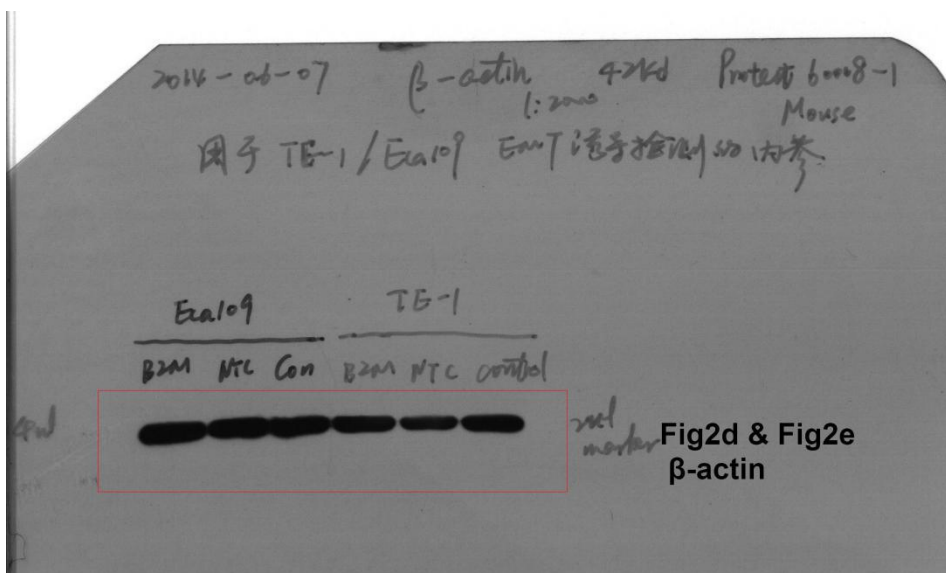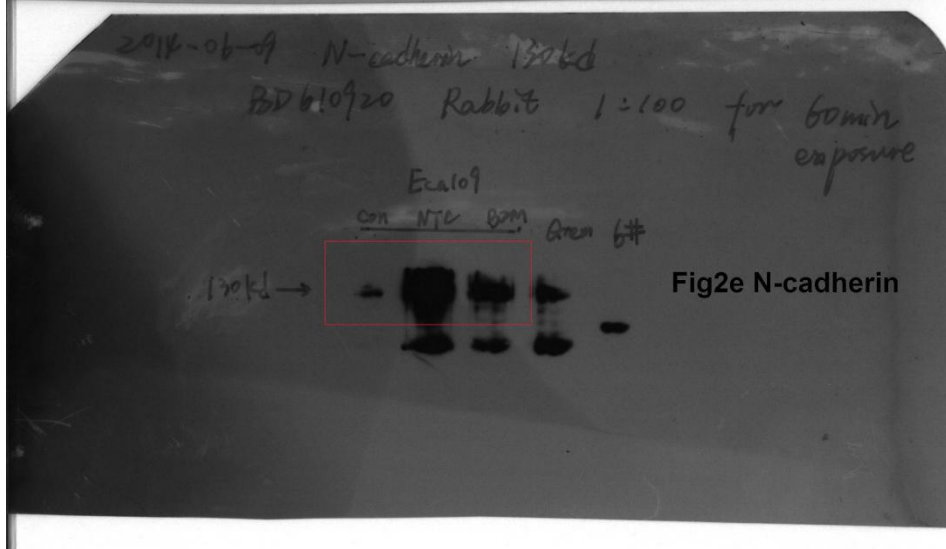

**Supplementary Figure S7: JAK2 inhibitor sabotaged the EMT induction of MSC<sup>NTC</sup>-CM**

Western blots analysis in Eca109 cells indicated that IL6/JAK2/STAT3 pathway involved in the EMT process triggered by MSC<sup>NTC</sup>-CM which could be inhibited by AG490 (T3434, Sigma-Aldrich). Blocking B2M in MSCs partially inhibited the expression of snail but barely affected phosphorylated STAT3.

**Original western blot scanning document were attached.**

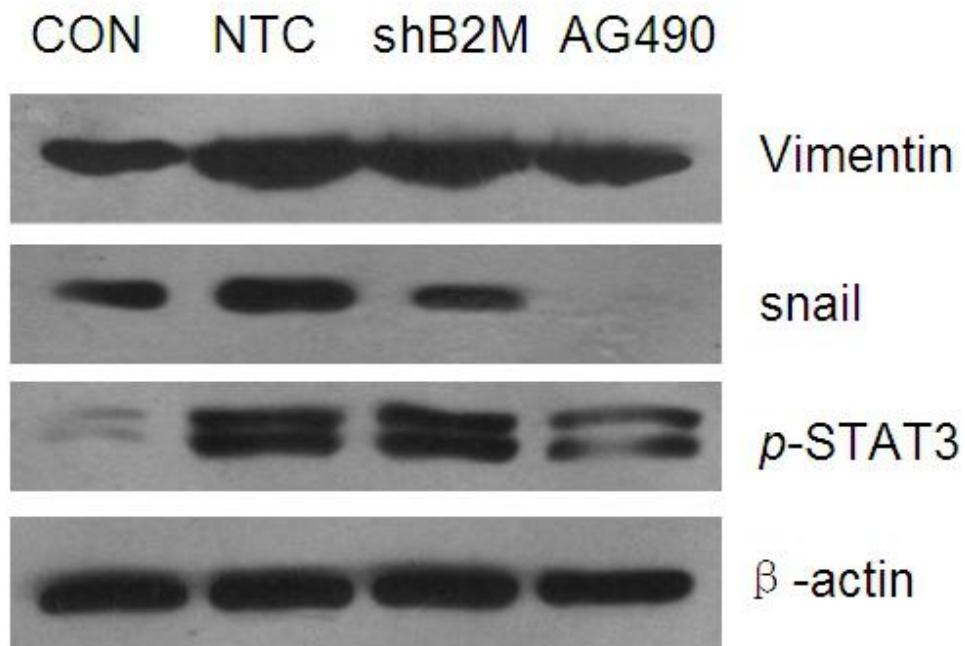



2015-03-17 Ecal9 (2015-01-22 蛋G)  
Vimentin 76kd (c) Ab61939 Rabbit

Ab61939 BSA NTC Con

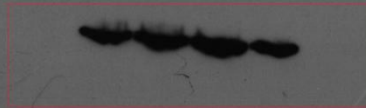

vimentin

2015-04-01 p-STAT3 Ecal9  
p-STAT3 (Tyr705) CST#9131 Rabbit 79/86kd 1:500  
抗体来自中山三院黄昌昌(免疫研究所) RT. 3h  
+4°C O.N

Ab9131 BSA NTC Con

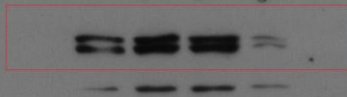

p-STAT3

2015-04-01 Ecal9 Snail  
snail 27kd CST#3879P 1:800 Rabbit

Ab3879P BSA NTC Con

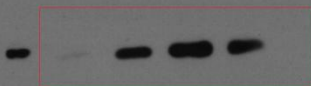

snail

2015-03-20 Ecal9  $\beta$ -actin

Ab6880 BSA NTC Con

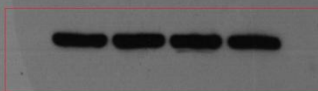

$\beta$ -actin

**Supplementary Table S1.** Sequences of oligos used for cloning shRNAs

---

| shRNA | Forward  | Oligo Sequence                       |
|-------|----------|--------------------------------------|
| ID    | /Reverse |                                      |
| B2M-1 | Forward  | TGCCGTGTGAACCATGTGACTTTCTTCCTGTCAAAA |
|       | Oligo    | GTCACATGGTTCACACGGTTTTTTC            |
|       | Reverse  | TCGAGAAAAAACCGTGTGAACCATGTGACTTTTGAC |
|       | Oligo    | AGGAAGAAAGTCACATGGTTCACACGGCA        |
| B2M-2 | Forward  | TGAGGTTTGAAGATGCCGCATTTCTTCCTGTCAAAT |
|       | Oligo    | GCGGCATCTTCAAACCTTTTTTTC             |
|       | Reverse  | TCGAGAAAAAAGGTTTGAAGATGCCGCATTTTGAC  |
|       | Oligo    | AGGAAGAAATGCGGCATCTTCAAACCTCA        |

---

**Supplementary Table S2.** List of the qRT-PCR primers used in this study

| Target Gene | Forward primer                   | Reverse primer                  |
|-------------|----------------------------------|---------------------------------|
| GAPDH       | 5'-GAAGGTGAAGGTCGGA<br>GTC-3'    | 5'-GAAGATGGTGATGGGAT<br>TTC-3'  |
| E-cadherin  | 5'-CCCACCACGTACAAGGG<br>TC-3'    | 5'-CTGGGGTATTGGGGGCA<br>TC -3'  |
| N-cadherin  | 5'-GCGCTGGCACCGTTTT<br>AC-3'     | 5'-CCTGAGCACGAAGAGT<br>GTAGA-3' |
| Vimentin    | 5'-ACGTCAGCAATATGAAA<br>GTGTG-3' | 5'-ACCTGTCTCCGGTACTC<br>A-3'    |
| B2M         | 5'-TGTGCTCGCGCTACTCT-<br>3'      | 5'-GTCAACTTCAATGTCGG<br>ATG-3'  |

**Supplementary Table S3.** The detail information of 30 cases esophageal cancer patients after resection.

| Patient No. | Gender F/M | Age | Differentiation grade | Tumor Stage | B2M IHC result | PFS (month) |
|-------------|------------|-----|-----------------------|-------------|----------------|-------------|
| 824806      | F          | 60  | Moderate              | IIIB        | (-)            | 8           |
| 828887      | F          | 49  | Moderate              | IIA         | (-)            | 14          |
| 848967      | F          | 63  | Moderate              | IIIA        | (-)            | 9           |
| 837978      | F          | 60  | Moderate              | IIB         | (-)            | 8           |
| 857081      | F          | 53  | Moderate              | IIA         | (-)            | 9           |
| 812597      | F          | 69  | Moderate              | IIIA        | (-)            | 4           |
| 824444      | F          | 46  | Moderate              | IIIB        | (-)            | 6           |
| 861532      | F          | 51  | Moderate              | IIA         | (-)            | 7           |
| 827923      | F          | 58  | High                  | IV          | (-)            | 4           |
| 834531      | F          | 57  | Moderate              | IIA         | (-)            | 12          |
| 828914      | F          | 63  | High                  | IIIA        | (-)            | 4           |
| 831680      | F          | 55  | Moderate              | IIIA        | (-)            | 5           |
| 838666      | F          | 48  | Moderate              | IIA         | (-)            | 10          |
| 837682      | F          | 59  | High                  | IIA         | (-)            | 12          |
| 829769      | F          | 72  | Moderate              | IIA         | (-)            | 12          |
| 833668      | F          | 59  | Moderate              | IIA         | (-)            | 6           |

|        |   |    |          |      |     |    |
|--------|---|----|----------|------|-----|----|
| 819458 | F | 62 | High     | IIA  | (-) | 10 |
| 828752 | F | 41 | Moderate | IIA  | (-) | 10 |
| 816156 | M | 75 | High     | IIA  | (+) | 8  |
| 852226 | F | 59 | Moderate | IIA  | (+) | 4  |
| 858149 | F | 60 | Moderate | IIA  | (+) | 6  |
| 811757 | F | 69 | Moderate | IIA  | (+) | 6  |
| 818960 | M | 57 | High     | IIA  | (+) | 2  |
| 817356 | F | 64 | High     | IIA  | (+) | 12 |
| 816106 | M | 79 | Moderate | IV   | (+) | 6  |
| 846722 | M | 73 | Moderate | IIA  | (+) | 4  |
| 827438 | M | 66 | Moderate | IIIA | (+) | 6  |
| 818887 | M | 62 | Moderate | IIA  | (+) | 10 |
| 845577 | F | 64 | Moderate | IIB  | (+) | 3  |
| 860896 | M | 54 | Moderate | IIIA | (+) | 2  |

---
